1 **Polygenic associations and causal inferences between serum**  
2 **immunoglobulins and amyotrophic lateral sclerosis**

3 Xu Chen<sup>1,2\*</sup>, Xiaojun Shen<sup>2</sup>, Xuzhuo Zhang<sup>1</sup>, Yiqiang Zhan<sup>3,4</sup> and Fang Fang<sup>4</sup>

4  
5 <sup>1</sup>Department of Central Laboratory, Shenzhen Baoan Women's and Children's Hospital,  
6 Jinan University, Shenzhen, China.

7 <sup>2</sup>Institute of Maternal-Fetal Medicine, Shenzhen Baoan Women's and Children's Hospital,  
8 Jinan University, Shenzhen, China.

9 <sup>3</sup>German Center for Neurodegenerative Diseases (DZNE), Ulm, Germany.

10 <sup>4</sup>Institute of Environmental Medicine, Karolinska Institutet, Stockholm, Sweden.

11

12

13 **Correspondence:**

14 Dr. Xu Chen. Department of Central Laboratory, Shenzhen Baoan Women's and Children's  
15 Hospital, Jinan University, 56 YuLv Road, Shenzhen 518100, China. Phone: +86-  
16 15989385199; Email: [dr.xuchen@outlook.com](mailto:dr.xuchen@outlook.com)

17 **Abstract**

18 Chronic inflammation might contribute to the development of amyotrophic lateral sclerosis (ALS),  
19 the relationship between serum immunoglobulins and risk of ALS remains however unclear. In order  
20 to overcome limitations like reverse causation and residual confounding commonly seen in the  
21 observational studies, we applied molecular epidemiological analyses to examine the polygenic and  
22 causal associations between serum immunoglobulins and ALS. Summary statistics from the large-  
23 scale genome-wide association studies (GWAS) among European ancestry populations (~15000  
24 individuals for serum immunoglobulins, and more than 36000 individuals for ALS) were accessed  
25 from different consortia. The relationships between three types of serum immunoglobulins (IgA,  
26 IgM, and IgG) and ALS were investigated in a discovery phase and then in a replication phase.  
27 Polygenic risk score (PRS) analysis was performed with PRSice package to test the polygenic  
28 association, and Mendelian randomization (MR) analysis was performed with TwoSampleMR  
29 package to infer the causality. An inverse polygenic association was discovered between IgA and  
30 ALS as well as between IgM and ALS. Such associations were however not replicated using a larger  
31 GWAS of ALS, and no causal association was observed for either IgA-ALS or IgM-ALS. A positive  
32 polygenic association was both discovered [odds ratio (OR) = 1.18, 95% confidence interval (CI):  
33 1.12-1.25,  $P=5.9\times 10^{-7}$ ] and replicated (OR=1.13, 95% CI: 1.06-1.20,  $P=0.001$ ) between IgG and  
34 ALS. A causal association between IgG and ALS was also suggested in both the discovery  
35 (OR=1.06, 95%CI: 1.02-1.10,  $P=0.009$ ) and replication (OR=1.07, 95%CI: 0.90-1.24,  $P=0.420$ )  
36 analyses, although the latter was not statistically significant. This study suggests a shared polygenic  
37 risk between serum IgG (as a biomarker for chronic inflammation) and ALS.

38

39

40 **Keywords**

41 Immunoglobulins, Amyotrophic lateral sclerosis, Polygenic risk score, Causal inference, Mendelian  
42 randomization

43 **Introduction**

44 Amyotrophic lateral sclerosis (ALS) is a relatively rare but fatal neurodegenerative disease. Chronic  
45 inflammation and altered immune responses have been suggested to contribute to the pathogenesis  
46 of ALS [1]. The relationship between serum immunoglobulins, as known biomarkers for  
47 inflammation and immune responses, and risk of ALS remains however unclear. In a previous study  
48 [2], we did not find a statistically significant positive association between immunoglobulin G (IgG)  
49 and risk of ALS [hazard ratio=1.04, 95% confidence interval (CI): 0.89-1.22; per 2.99 g/L increase  
50 of IgG]. In the same study, we also found that during the 20 years before diagnosis, patients with  
51 ALS had more rapidly declining levels of IgG compared to others. We speculate that the noted lack  
52 of association between IgG and ALS might be attributable to both a real positive association  
53 between IgG and ALS (i.e., higher levels of IgG lead to higher risk of ALS) and reverse causation  
54 (i.e., ALS results in declined levels of IgG). In addition to reverse causation, observational studies  
55 are also prone to other systemic errors, which collectively make it often difficult to infer causality  
56 for associations noted in observational studies [3].

57  
58 By using the summary statistics from large-scale genome-wide association studies (GWAS),  
59 polygenic risk score (PRS) and Mendelian randomization (MR) analyses have added novel evidence  
60 to support polygenic and causal relationships between several traits and ALS, corroborating  
61 importantly findings from previous observational studies [4-6]. In this study, we used GWAS  
62 summary statistics to assess the associations of genetically predicted levels of immunoglobulins with  
63 the genetically predicted risk of ALS, and to test whether such associations are causal. Since IgG is a  
64 biomarker for chronic inflammation, we hypothesized that there is a positive and causal relationship  
65 between IgG and ALS. We additionally studied another two serum immunoglobulins (IgA and IgM,  
66 two biomarkers that have rarely been studied in ALS) to assess the specificity of the IgG result.

67

68

69 **Methods**

70 **Summary statistics**

71 We used publicly available summary statistics of several GWAS within the European ancestry  
72 population in this study. GWAS of serum immunoglobulins (IgA, IgM, and IgG) were conducted  
73 among ~15000 individuals (from Iceland and Sweden), from which single nucleotide

74 polymorphisms (SNPs) with the association P-values  $<1.0 \times 10^{-6}$  were available [7]. GWAS summary  
75 statistics of ALS were obtained from two studies (available in the IEU GWAS database;  
76 <https://gwas.mrcieu.ac.uk>, ID for ALS\_2016: ieu-a-1085; ID for ALS\_2018: ebi-a-GCST005647). In  
77 the discovery analysis, summary statistics of ALS (ALS\_2016) were obtained from a GWAS  
78 performed among 36052 individuals (including 12577 patients with ALS and 23475 controls) by the  
79 Project MinE group [8]. In the replication analysis, summary statistics of ALS (ALS\_2018) were  
80 obtained from a meta-analysis incorporating the results from ALS\_2016 and another GWAS  
81 including 40598 individuals (8229 patients with ALS and 32369 controls) [9]. Because we only used  
82 GWAS summary statistics rather than individual-level data in this study, participant informed consent  
83 and ethical review permit were waived according to the ethical review board of Shenzhen Baoan  
84 Women's and Children's Hospital.

85  
86 Using IgA, IgM, and IgG as the exposures (base traits) and ALS as the outcome (target trait), the  
87 polygenic and causal associations of six exposure-outcome pairs (three in the discovery analysis and  
88 three in the replication analysis) were investigated by PRS and MR analyses, respectively. Because  
89 the values of immunoglobulins were standardized in the GWAS, we estimated accordingly odds  
90 ratio (OR) per standard deviation of genetically predicted level for each type of immunoglobulin in  
91 the present study.

92  
93 **PRS analyses**  
94 Polygenic associations were investigated by PRS analyses in Linux with PRSice package (version  
95 1.25) [10]. For the summary statistics of each exposure, correlated SNPs were pruned by linkage  
96 disequilibrium (LD) clumping with default parameter settings. Genotypes of the HapMap\_ceu\_all  
97 (release 22, 60 individuals, 3.96 million SNPs) were used as the reference panel, clumping threshold  
98  $p_1=p_2=0.5$ , LD threshold  $r^2=0.05$ , and the distance threshold of 300Kb. Independent SNPs were then  
99 extracted and included in 100000 quantiles with gradually increasing P-value thresholds ( $P_T$ , ranging  
100 from 0 to  $1.0 \times 10^{-6}$ , in steps of  $1.0 \times 10^{-11}$  per quantile). The  $P_T$  of the quantile that explained the  
101 largest variance of the target was defined as the best-fitted  $P_T$ .

102  
103 **MR analyses**

104 Utilizing the instrumental variable (IV) methods (Fig. 1), MR analyses were performed in R (version  
105 3.6.1) with TwoSampleMR package (version 0.5.2) [11]. Causal inference by MR analysis requires  
106 three basic assumptions: 1) relevance, i.e., IVs have causal effects on the exposure (e.g., IgG); 2)  
107 exclusion restriction, i.e., IVs affect the outcome (e.g., ALS), only through the exposure; and 3)  
108 exchangeability or independence, i.e., no common causes exist between IVs and the outcome [12].  
109 Lead SNPs from the genetic loci reported to be associated with each exposure were extracted from  
110 the GWAS of immunoglobulins [7]. The associations of the SNPs with other traits (associations with  
111 a P-value  $<5 \times 10^{-8}$ ) were checked in GWAS Catalog (<https://www.ebi.ac.uk/gwas>) and excluded,  
112 leaving independent lead SNPs after LD clumping as the IVs (Additional file: Table S1). The causal  
113 relationship of each exposure-outcome pair was primarily examined by the inverse variance  
114 weighted (IVW) method and complemented with another four methods (MR Egger regression,  
115 weighted median, simple and weighted mode) as sensitivity analyses.

116

117

## 118 **Results and discussion**

119 Inverse polygenic associations were discovered for IgA-ALS and IgM-ALS, neither of the  
120 associations was however replicated (Table 1, Additional file: Figs. 1-2). A positive polygenic  
121 association between IgG and ALS was found both in the discovery and replication analyses (Table 1,  
122 Additional file: Fig. 3). The OR was 1.18 (95% CI: 1.12-1.25,  $P=5.9 \times 10^{-7}$ ) in the discovery analysis  
123 and 1.13 (95%CI: 1.06-1.20,  $P=0.001$ ) in the replication analysis.

124

125 In the MR analyses, causal association was not found for either IgA-ALS or IgM-ALS (Table 2),  
126 regardless of the use of MR methods (Additional file: Figs. 4-5 and Table S2). For IgG-ALS (Table  
127 2, Additional file: Fig. 6), a statistically significant causal association was found in the discovery  
128 analysis (OR=1.06, 95% CI: 1.02-1.10,  $P=0.009$ ). A causal positive association was also suggested  
129 in the replication analysis, although not statistically significant (OR=1.07, 95%CI: 0.90-1.24,  
130  $P=0.420$ ).

131

132 Utilizing PRS and MR analyses of large-scale GWAS of immunoglobulins and ALS, we provided  
133 new evidence supporting a potentially causal positive association between IgG, but not IgA or IgM,  
134 and risk of ALS.

135  
136 Accumulating evidence supports that inflammation and altered immune responses are involved in  
137 the different phases of ALS [13]. Physiological barriers (e.g., blood-brain barrier) and innate  
138 immunity cells (e.g., macrophages) are fundamental in the maintenance and modulation of the  
139 central nervous system, whereas chronic inflammation might lead to dysfunction of the neurons [14].  
140 B cells play important roles in adaptive immunity, through producing immunoglobulins and  
141 presenting antigens to T cells [15]. IgA constitutes 10-20% of serum immunoglobulins and is mainly  
142 involved in the mucosal immune response. IgM constitutes 5-10% of serum immunoglobulins and is  
143 the earliest released antibody during adaptive immune response. IgG constitutes ~75% of serum  
144 immunoglobulins and can be transmitted through placental and blood-brain barriers [16].

145  
146 Several studies have indicated a link between IgG and ALS. Deposit of IgG has been found in the  
147 spinal cord and motor cortex of some ALS patients [17]. Prevalence of serum monoclonal  
148 immunoglobulins (60%, including 44% IgG and 16% IgM) was found to be higher among ALS  
149 patients than that of the control group (13%) [18]. High levels of 20 IgG antibodies were also found  
150 to help diagnose ALS cases [19]. In our previous cohort study including more than half a million  
151 participants with >20 years of follow-up, we found that per 2.99 g/L increase of IgG levels in blood,  
152 there was a 4% increased risk of ALS, although the association was not statistically significant [2].  
153 The lack of statistical significance might be multifactorial, including first a potentially real positive  
154 association between IgG and ALS risk, a lack of statistical power due to the relatively small number  
155 of ALS cases identified (N=152), and also reverse causation (i.e., patients with ALS had more  
156 rapidly declining IgG levels, compared to individuals not developing ALS, during the 20 years  
157 before ALS diagnosis). However, because genotypes are determined at birth and unchangeable  
158 during the life course, our results about a potentially causal relationship between genetically  
159 predicted IgG level and genetically predicted ALS risk are unlikely to be dependent on early or late  
160 stage of ALS.

161  
162 By using summary statistics from several large-scale GWAS, in the present study, we identified a  
163 statistically significant positive polygenic association between IgG and ALS in both the discovery  
164 and replication analyses. The association is further suggested to be causal in the MR analysis.  
165 Although statistically significant result was only obtained in the discovery analysis, similar point

166 estimate was noted in the replication analysis. The differences between the discovery (ALS\_2016)  
167 and replication (ALS\_2018) samples might have contributed to the lack of statistical significance in  
168 the replication analysis. For instance, in the discovery GWAS (ALS\_2016), patients with ALS and  
169 controls were matched for age, sex, and geographic regions, whereas more than 50% of participants  
170 in the replication GWAS (ALS\_2018) were only matched for race/ethnicity.

171  
172 In contrast to IgG, no clear polygenic association nor causal relationship was noted for IgA-ALS and  
173 IgM-ALS. A recent observational study, including 489 patients with ALS and 17475 neurologically  
174 healthy controls, also failed to detect an association between total serum IgA and ALS [20]. The  
175 different result pattern between IgA, IgM and IgG might be partly explained by the fact that IgG is a  
176 biomarker for chronic inflammation and bypasses the blood-brain-barrier, which might be more  
177 relevant for neurodegenerative diseases including ALS, compared to the other immunoglobulins [21].

178  
179 Even though we used the latest and largest GWAS of immunoglobulins, only two independent SNPs  
180 could be selected as IVs for IgG. As a result, we could only use IVW methods in the MR analysis.  
181 According to the current GWAS Catalog, no genome-wide significant association was identified  
182 between the two IVs of IgG and other non-ALS traits. Interestingly, the two genes near these two  
183 IVs are both biologically related to immune responses, neuroinflammation, and neurodegeneration.  
184 Genetic variant rs7554873 is close to the *FCGR2B* (Fc fragment of IgG receptor IIb) gene on  
185 chromosome 1. Protein FcγRIIB encoded by *FCGR2B* gene is a low-affinity receptor for the Fc  
186 region of IgG. FcγRIIB involves in the regulation of antibodies produced by B-cells and in the  
187 phagocytosis of immune complexes, it is also reported to mediate the inhibitory effect of aggregated  
188 α-synuclein on microglial phagocytosis [22]. Genetic variant rs2133037 is close to the HLA-DQB1  
189 (major histocompatibility complex, class II, DQ beta 1) gene on chromosome 6. Its encoded protein  
190 HLA-DQB1 is also reported to be associated with immunity and neuronal survival [23].

191  
192 In this study, we had only access to GWAS summary statistics data when testing the polygenic and  
193 causal relationship between serum immunoglobulins (IgA, IgM, IgG) and ALS. Using a Mendelian  
194 randomization analysis, our study is less prone to methodological limitations commonly seen in  
195 observational studies such as confounding and reverse causation. Future studies with individual  
196 genotype data are warranted in further understanding the roles of other factors (such as age, sex,

197 ethnicity, etc.) in the link between different immunoglobulins (especially IgG) and ALS. Further, to  
198 test whether chronic inflammation is indeed a mechanism linking together IgG and ALS, the role of  
199 IgG on other diseases (both diseases with a known link with chronic inflammation and diseases  
200 without such a link) needs to be studied. Finally, as high levels of IgG antibodies were suggested to  
201 improve the diagnosis of ALS [19], the potential use of IgG measurement in clinical diagnosis of  
202 ALS needs to be further examined.

203

204

## 205 **Conclusions**

206 In conclusion, our study suggests a shared polygenic risk between serum IgG and ALS. The  
207 causality between IgG and ALS needs to be further validated when more instrumental variables are  
208 available and when different methods of causal inference are possible to use.

209

210

## 211 **Supplementary information**

212 **Additional file: Table S1.** Selection of instrumental variables for serum immunoglobulins in the  
213 Mendelian randomization analyses. **Table S2.** Comparison of results from different methods in  
214 Mendelian randomization analyses. **Figure S1.** Results from the polygenic risk score analyses  
215 between serum IgA and ALS. **Figure S2.** Results from the polygenic risk score analyses between  
216 serum IgM and ALS. **Figure S3.** Results from the polygenic risk score analyses between serum IgG  
217 and ALS. **Figure S4.** Results from the Mendelian randomization analyses between serum IgA and  
218 ALS. **Figure S5.** Results from the Mendelian randomization analyses between serum IgM and ALS.  
219 **Figure S6.** Results from the Mendelian randomization analyses between serum IgG and ALS.

220

221

## 222 **List of abbreviations**

223 ALS: Amyotrophic lateral sclerosis; Ig: immunoglobulin; CI: confidence interval; GWAS: genome-  
224 wide association study; PRS: polygenic risk score; MR: Mendelian randomization; SNP: single  
225 nucleotide polymorphism; OR: odds ratio; LD: linkage disequilibrium; IVW: inverse variance  
226 weighted; FCGR2B: Fc fragment of IgG receptor IIb; HLA-DQB1: Major histocompatibility  
227 complex, class II, DQ beta 1.



228

229

## 230 **Declarations**

231 ***Acknowledgements:*** The authors would like to thank the Project MinE group and the ALS Variant  
232 Server for sharing the summary statistics of GWAS on ALS.

233 ***Authors' contributions:*** X.C. and F.F. contributed to the conception and design of the study; X.C.,  
234 X.S., X.Z., and Y.Z. contributed to acquisition and analyses of data; X.C., X.S., X.Z., Y.Z., and F.F.  
235 contributed to drafting and revising the manuscript.

236 ***Funding:*** This project is supported by the Science, Technology and Innovation Bureau of Baoan  
237 District (Grant No.: 2020JD445), the Swedish Research Council (Grant No.: 2019-01088) and  
238 Karolinska Institutet (Senior Researcher Award and Strategic Research Area in Epidemiology).

239 ***Availability of data and materials:*** GWAS summary statistics of ALS were accessed from the  
240 Project MinE group (<https://www.projectmine.com/research/download-data>) and the ALS Variant  
241 Server (<http://als.umassmed.edu>).

242 ***Ethics approval and consent to participate:*** Because GWAS summary statistics rather than  
243 individual-level data were used in this study, both informed consent and ethical approval were  
244 waived according to the ethical review board in Shenzhen Baoan Women's and Children's Hospital.

245 ***Consent for publication:*** Not applicable.

246 ***Competing interests:*** The authors declare that they have no competing interests.

247

248

## 249 **References**

250 1. Beers DR, Appel SH: Immune dysregulation in amyotrophic lateral sclerosis: mechanisms and emerging  
251 therapies. *Lancet Neurol* 2019, 18:211-220.

252 2. Yazdani S, Mariosa D, Hammar N, Andersson J, Ingre C, Walldius G, Fang F: Peripheral immune  
253 biomarkers and neurodegenerative diseases: A prospective cohort study with 20 years of follow-up.  
254 *Ann Neurol* 2019, 86:913-926.

- 255 3. Vandenberg JP, Broadbent A, Pearce N: Causality and causal inference in epidemiology: the need for  
256 a pluralistic approach. *Int J Epidemiol* 2016, 45:1776-1786.
- 257 4. Chen X, Yazdani S, Piehl F, Magnusson PKE, Fang F: Polygenic link between blood lipids and amyotrophic  
258 lateral sclerosis. *Neurobiol Aging* 2018, 67: e201-e206.
- 259 5. Bandres-Ciga S, Noyce AJ, Hemani G, Nicolas A, Calvo A, Mora G, Consortium I, International ALSGC,  
260 Tienari PJ, Stone DJ, et al: Shared polygenic risk and causal inferences in amyotrophic lateral sclerosis.  
261 *Ann Neurol* 2019, 85:470-481.
- 262 6. Zhan Y, Fang F: Smoking and amyotrophic lateral sclerosis: A mendelian randomization study. *Ann*  
263 *Neurol* 2019, 85:482-484.
- 264 7. Jonsson S, Sveinbjornsson G, de Lapuente Portilla AL, Swaminathan B, Plomp R, Dekkers G, Ajore R, Ali  
265 M, Bentlage AEH, Elmer E, et al: Identification of sequence variants influencing immunoglobulin levels.  
266 *Nat Genet* 2017, 49:1182-1191.
- 267 8. van Rheenen W, Shatunov A, Dekker AM, McLaughlin RL, Diekstra FP, Pulit SL, van der Spek RA, Vosa U,  
268 de Jong S, Robinson MR, et al: Genome-wide association analyses identify new risk variants and the  
269 genetic architecture of amyotrophic lateral sclerosis. *Nat Genet* 2016, 48:1043-1048.
- 270 9. Nicolas A, Kenna KP, Renton AE, Ticozzi N, Faghri F, Chia R, Dominov JA, Kenna BJ, Nalls MA, Keagle P, et  
271 al: Genome-wide Analyses Identify KIF5A as a Novel ALS Gene. *Neuron* 2018, 97:1268-1283.
- 272 10. Euesden J, Lewis CM, O'Reilly PF: PRSice: Polygenic Risk Score software. *Bioinformatics* 2015, 31:1466-  
273 1468.
- 274 11. Hemani G, Zheng J, Elsworth B, Wade KH, Haberland V, Baird D, Laurin C, Burgess S, Bowden J, Langdon  
275 R, et al: The MR-Base platform supports systematic causal inference across the human phenome. *Elife*  
276 2018, 7:e34408.
- 277 12. Armon C: Smoking is a cause of amyotrophic lateral sclerosis. High low-density lipoprotein cholesterol  
278 levels? *Unsure. Ann Neurol* 2019, 85:465-469.
- 279 13. Molteni M, Rossetti C: Neurodegenerative diseases: The immunological perspective. *J Neuroimmunol*  
280 2017, 313:109-115.
- 281 14. Novellino F, Sacca V, Donato A, Zaffino P, Spadea MF, Vismara M, Arcidiacono B, Malara N, Presta I,  
282 Donato G: Innate Immunity: A Common Denominator between Neurodegenerative and  
283 Neuropsychiatric Diseases. *Int J Mol Sci* 2020, 21(3):1115.
- 284 15. Sabatino JJ, Jr., Probstel AK, Zamvil SS: B cells in autoimmune and neurodegenerative central nervous  
285 system diseases. *Nat Rev Neurosci* 2019, 20:728-745.
- 286 16. Chen K, Magri G, Grasset EK, Cerutti A: Rethinking mucosal antibody responses: IgM, IgG and IgD join  
287 IgA. *Nat Rev Immunol* 2020, 20(7):427-441.
- 288 17. Donnenfeld H, Kascsak RJ, Bartfeld H: Deposits of IgG and C3 in the spinal cord and motor cortex of ALS  
289 patients. *J Neuroimmunol* 1984, 6(1):51-57.

- 290 18. Duarte F, Binet S, Lacomblez L, Bouche P, Preud'homme JL, Meininger V: Quantitative analysis of  
291 monoclonal immunoglobulins in serum of patients with amyotrophic lateral sclerosis. *J Neurol Sci* 1991,  
292 104(1):88-91.
- 293 19. May C, Nordhoff E, Casjens S, Turewicz M, Eisenacher M, Gold R, Brüning T, Pesch B, Stephan C,  
294 Voitalla D, et al: Highly immunoreactive IgG antibodies directed against a set of twenty human proteins  
295 in the sera of patients with amyotrophic lateral sclerosis identified by protein array. *PLoS One* 2014,  
296 9(2):e89596.
- 297 20. Crayle J, Elmallah M, Sleasman J, Bedlack R: Total serum immunoglobulin A in ALS. *Amyotroph Lateral*  
298 *Scler Frontotemporal Degener* 2020, 1-5.
- 299 21. Watson N, Ding B, Zhu X, Frisina RD: Chronic inflammation - inflammaging - in the ageing cochlea: A  
300 novel target for future presbycusis therapy. *Ageing Res Rev* 2017, 40:142-148.
- 301 22. Choi YR, Kang SJ, Kim JM, Lee SJ, Jou I, Joe EH, Park SM: FcγRIIB mediates the inhibitory effect of  
302 aggregated alpha-synuclein on microglial phagocytosis. *Neurobiol Dis* 2015, 83:90-99.
- 303 23. Hallberg P, Smedje H, Eriksson N, Kohnke H, Daniilidou M, Ohman I, Yue QY, Cavalli M, Wadelius C,  
304 Magnusson PKE, et al: Pandemrix-induced narcolepsy is associated with genes related to immunity and  
305 neuronal survival. *EBioMedicine* 2019, 40:595-604.
- 306

307 **Figure 1. Illustration of the Mendelian randomization analysis**

308 Mendelian randomization analysis utilizes the instrumental variable (IV) methods to infer the  
309 causality between exposure and outcome. Because alleles are randomly assigned during mitosis,  
310 restricted single nucleotide polymorphisms (SNPs) could be used as instrumental variables to test the  
311 causal effect of exposure on the outcome. ALS: amyotrophic lateral sclerosis.

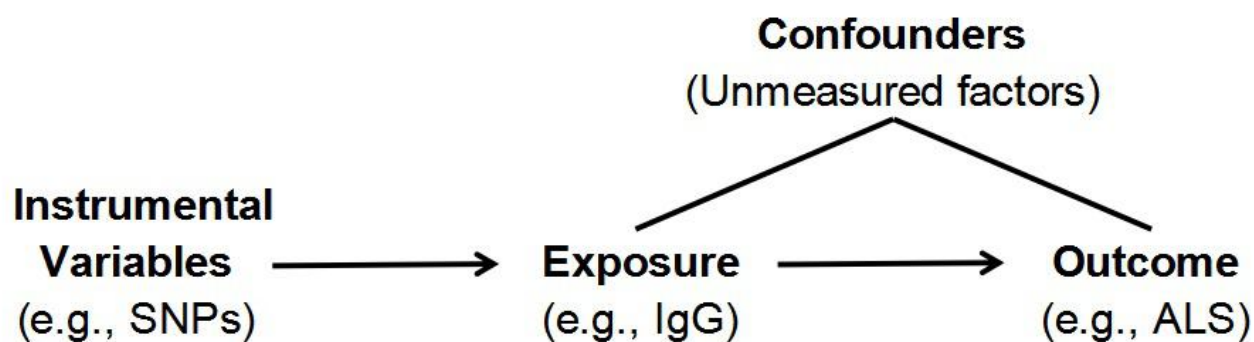

312

313

314 **Table 1. Polygenic associations between serum immunoglobulins and ALS in PRS analyses**

| Base | Target   | Best-fitted $P_T$        | $n_{SNP}$ | OR    | SE    | $r^2$ (%) | P-value              |
|------|----------|--------------------------|-----------|-------|-------|-----------|----------------------|
| IgA  | ALS_2016 | $8.6000 \times 10^{-10}$ | 54        | 0.861 | 0.032 | 0.059     | $4.2 \times 10^{-6}$ |
|      | ALS_2018 | $7.0001 \times 10^{-7}$  | 43        | 0.948 | 0.031 | 0.004     | 0.085                |
| IgM  | ALS_2016 | $4.8000 \times 10^{-10}$ | 47        | 0.905 | 0.032 | 0.028     | 0.002                |
|      | ALS_2018 | $3.5010 \times 10^{-8}$  | 42        | 1.051 | 0.028 | 0.004     | 0.074                |
| IgG  | ALS_2016 | $5.1001 \times 10^{-7}$  | 49        | 1.181 | 0.033 | 0.069     | $5.9 \times 10^{-7}$ |
|      | ALS_2018 | $5.7001 \times 10^{-7}$  | 22        | 1.130 | 0.036 | 0.014     | 0.001                |

315 PRS=polygenic risk score; ALS=amyotrophic lateral sclerosis; Best-fitted  $P_T$ =association P-value  
316 threshold of the quantile that explained the largest variance of the target;  $n_{SNP}$ =numbers of  
317 independent single nucleotide polymorphisms (SNPs) included in the best-fitted quantile; OR: odds  
318 ratio per standard deviation of genetically determined level for each type of immunoglobulin;  
319 SE=standard error;  $r^2$ = the proportion of the target variation explained by SNPs in the best-fitted  
320 quantile.

321

322 **Table 2. Causal inferences between serum immunoglobulins and ALS in the MR analyses**

| Base | Target   | n <sub>SNP</sub> | OR <sub>IVW</sub> | SE <sub>IVW</sub> | P <sub>IVW</sub> | Het_P <sub>IVW</sub> |
|------|----------|------------------|-------------------|-------------------|------------------|----------------------|
| IgA  | ALS_2016 | 6                | 0.968             | 0.022             | 0.148            | 0.206                |
|      | ALS_2018 | 6                | 0.880             | 0.100             | 0.201            | 0.125                |
| IgM  | ALS_2016 | 5                | 0.996             | 0.015             | 0.787            | 0.574                |
|      | ALS_2018 | 5                | 1.021             | 0.054             | 0.706            | 0.874                |
| IgG  | ALS_2016 | 2                | 1.056             | 0.021             | 0.009            | 0.617                |
|      | ALS_2018 | 2                | 1.073             | 0.087             | 0.420            | 0.407                |

323 MR=mendelian randomization; ALS=amyotrophic lateral sclerosis; n<sub>SNP</sub>= numbers of independent  
324 single nucleotide polymorphisms (SNPs) uses as instrumental variables; OR: odds ratio per standard  
325 deviation of genetically determined level for each type of immunoglobulin; SE=standard error;  
326 IVW= inverse variance weighted method; Het\_P=P-value of heterogeneity.

327
